# Supplementary material for: Epigenome-wide DNA methylation profiling in Progressive Supranuclear Palsy reveals major changes at DLX1
Source: PubMed Central journal article supplement (PMC6062504; doi:10.1038/s41467-018-05325-y), 2018-07-26
Supplement: 41467_2018_5325_MOESM3_ESM.pdf [file 41467_2018_5325_MOESM3_ESM.pdf]

## **Description of Additional Supplementary Files**

File Name: Supplementary Data 1

Description: Information on clinical and neuropathological findings in PSP patients and controls.

File Name: Supplementary Data 2

Description: Differentially methylated CpG sites in PSP vs. controls.

File Name: Supplementary Data 3

Description: Methylation analysis at 17q21.31.

File Name: Supplementary Data 4

Description: Enrichment analysis of 375 differentially methylated genes.

File Name: Supplementary Data 5

Description: Information used for pathway analysis.

File Name: Supplementary Data 6

Description: Post-hoc Power Analysis.
